# Supplementary material for: Structure of the 70S Ribosome from the Human Pathogen Acinetobacter baumannii in Complex with Clinically Relevant Antibiotics
Source: PubMed Central journal article supplement (PMC7546915; doi:10.1016/j.str.2020.08.004), 2020-10-06
Supplement: mmc1.pdf [file mmc1.pdf]

**Structure, Volume 28**

**Supplemental Information**

**Structure of the 70S Ribosome from the Human  
Pathogen *Acinetobacter baumannii* in Complex  
with Clinically Relevant Antibiotics**

**David Nicholson, Thomas A. Edwards, Alex J. O'Neill, and Neil A. Ranson**

Table S1. **CryoEM data collection statistics, related to Figures 1-5.**

|                                                  | <b>amikacin-ribosome</b> | <b>tigecycline-ribosome</b> |
|--------------------------------------------------|--------------------------|-----------------------------|
| microscope                                       | Titan Krios              | Titan Krios                 |
| camera                                           | K2 Summit                | Falcon 3EC                  |
| collection mode                                  | counting                 | linear                      |
| voltage (kV)                                     | 300                      | 300                         |
| nominal magnification                            | 130,000                  | 75,000                      |
| pixel size (Å/px)                                | 1.07                     | 1.065                       |
| defocus range (µm)                               | (-0.8)-(-2.7)            | (-0.8)-(-2.6)               |
| exposure time (s)                                | 10                       | 1.1                         |
| total dose (e <sup>-</sup> /Å <sup>2</sup> )     | 58                       | 61.78                       |
| dose per frame (e <sup>-</sup> /Å <sup>2</sup> ) | 1.16                     | 1.44                        |
| micrographs collected                            | 2717                     | 6228                        |
| micrographs with good ice                        | 554                      | 6228                        |
| number of particles                              | 51958                    | 231159                      |
| symmetry imposed                                 | C1                       | C1                          |
| final resolution (Å)                             | 2.8                      | 2.6                         |



Table S2. Atomic model details. Related to Figure 1.

| rRNA chains |             |                          |           |                                                             |                      |
|-------------|-------------|--------------------------|-----------|-------------------------------------------------------------|----------------------|
| chain ID    | rRNA name   | GenBank accession number | locus tag | modelled residues                                           | corresponding EM map |
| 1           | 23S         | KL810966                 | DJ41_1033 | 2-868; 891-1034; 1101-1511; 1535-1712; 1726-2086; 2181-2891 | 50S                  |
| 2           | 16S 5'      | KL810966                 | DJ41_1036 | 3-77; 90-199; 210-837; 843-923                              | 30S body             |
| 3           | 16S central | KL810966                 | DJ41_1036 | 924-1022; 1031-1384                                         | 30S head             |
| 4           | 16S 3'      | KL810966                 | DJ41_1036 | 1385-1530                                                   | 30S body             |
| 5           | 5S          | KL810966                 | DJ41_1032 | 2-116                                                       | 50S                  |

| protein chains |              |                          |                      |                             |                      |       |
|----------------|--------------|--------------------------|----------------------|-----------------------------|----------------------|-------|
| chain ID       | protein name | UniProt accession number | full size (residues) | modelled residues           | corresponding EM map | notes |
| A              | uL2          | D0CD00                   | 274                  | 2-273                       | 50S                  |       |
| B              | uL3          | D0CCZ7                   | 212                  | 2-212                       | 50S                  |       |
| C              | uL4          | D0CCZ8                   | 200                  | 2-200 (2-12 no side chains) | 50S                  |       |
| D              | uL5          | D0CD09                   | 178                  | (2-177 no side chains)      | 50S                  |       |
| E              | uL6          | D0CD12                   | 177                  | 2-176                       | 50S                  |       |
| F              | uL13         | D0CG35                   | 142                  | 1-142                       | 50S                  |       |
| G              | uL14         | D0CD07                   | 122                  | 1-122                       | 50S                  |       |
| H              | uL15         | D0CD16                   | 146                  | 2-145                       | 50S                  |       |
| I              | uL16         | D0CD04                   | 137                  | 1-137                       | 50S                  |       |
| J              | bL17         | D0CD23                   | 125                  | 1-119                       | 50S                  |       |
| K              | uL18         | D0CD13                   | 116                  | 2-116                       | 50S                  |       |
| L              | bL19         | D0CCR8                   | 122                  | 2-118                       | 50S                  |       |
| M              | bL20         | D0CA76                   | 119                  | 2-118                       | 50S                  |       |
| N              | bL21         | D0CDQ6                   | 103                  | 1-103                       | 50S                  |       |
| O              | uL22         | D0CD02                   | 110                  | 2-110                       | 50S                  |       |
| P              | uL23         | D0CCZ9                   | 106                  | 1-92                        | 50S                  |       |
| Q              | uL24         | D0CD08                   | 105                  | 2-103                       | 50S                  |       |
| R              | bL25         | D0C9L7                   | 98                   | 3-98                        | 50S                  |       |
| S              | bL27         | D0CDQ7                   | 85                   | 9-84                        | 50S                  |       |
| T              | bL28         | D0CAL0                   | 78                   | 2-78                        | 50S                  |       |
| U              | uL29         | D0CD05                   | 65                   | 2-62                        | 50S                  |       |

|   |      |        |     |                                       |          |                        |
|---|------|--------|-----|---------------------------------------|----------|------------------------|
| V | uL30 | D0CD15 | 58  | 1-57                                  | 50S      |                        |
| W | bL31 | D0CBZ8 | 74  | (1-43 no side chains)                 | 50S      | tigecycline model only |
| X | bL32 | D0C9K5 | 61  | 2-55                                  | 50S      |                        |
| Y | bL33 | D0CAL1 | 51  | 1-51                                  | 50S      |                        |
| Z | bL34 | D0CG06 | 44  | 1-44                                  | 50S      |                        |
| a | bL35 | D0CA77 | 64  | 2-64                                  | 50S      |                        |
| b | bL36 | D0CD18 | 38  | 1-38                                  | 50S      |                        |
| c | uS2  | D0CC74 | 250 | (8-226 no side chains)                | 30S body |                        |
| d | uS3  | D0CD03 | 250 | 2-211                                 | 30S head |                        |
| e | uS4  | D0CD21 | 208 | 2-208 (23-30; 43-51 no side chains)   | 30S body |                        |
| f | uS5  | D0CD14 | 165 | 10-164                                | 30S body |                        |
| g | bS6  | D0C5Z0 | 127 | 1-103                                 | 30S body |                        |
| h | uS7  | D0C9P7 | 156 | 3-70; 97-145 (126-145 no side chains) | 30S head |                        |
| i | uS8  | D0CD11 | 131 | 2-131                                 | 30S body |                        |
| j | uS9  | D0CG36 | 128 | 2-128                                 | 30S head |                        |
| k | uS10 | D0CCZ6 | 103 | 4-103                                 | 30S head |                        |
| l | uS11 | D0CD20 | 128 | 15-128                                | 30S body |                        |
| m | uS12 | D0C9P6 | 124 | 2-123                                 | 30S body |                        |
| n | uS13 | D0CD19 | 118 | 2-116                                 | 30S head |                        |
| o | uS14 | D0CD10 | 101 | 2-101                                 | 30S head |                        |
| p | uS15 | D0CAU9 | 89  | 2-89                                  | 30S body |                        |
| q | bS16 | D0CCR5 | 83  | 1-80                                  | 30S body |                        |
| r | uS17 | D0CD06 | 85  | 5-83                                  | 30S body |                        |
| s | bS18 | D0C5Y9 | 75  | 21-73                                 | 30S body |                        |
| t | uS19 | D0CD01 | 91  | 2-84                                  | 30S head |                        |
| u | bS20 | D0C7N1 | 88  | 2-87                                  | 30S body |                        |
| v | bS21 | D0C5Q3 | 71  | 2-61 (2-36 no side chains)            | 30S body |                        |

| <b>other chains</b> |              |                             |                                                                                     |
|---------------------|--------------|-----------------------------|-------------------------------------------------------------------------------------|
| <b>chain ID</b>     | <b>name</b>  | <b>corresponding EM map</b> | <b>notes</b>                                                                        |
| 6                   | tRNA 5'      | 50S                         | residues 2-6 from PDB 5AFI E-site fMet-tRNA, probably actually a mixture of tRNAs   |
| 7                   | tRNA central | 30S head                    | residues 26-45 from PDB 5AFI E-site fMet-tRNA, probably actually a mixture of tRNAs |
| 8                   | tRNA 3'      | 50S                         | residues 69-76 from PDB 5AFI E-site fMet-tRNA, probably actually a mixture of tRNAs |
| 9                   | mRNA         | 30S head                    | 4 nucleotide polyU mRNA model, probably actually a mixture of mRNAs                 |

| <b>unmodelled proteins</b> |
|----------------------------|
| uL1                        |
| bL9                        |
| uL10                       |
| uL11                       |
| bL12                       |
| bS1                        |

Table S3. Unique structural features of the *A. baumannii* ribosome. Related to Figure 2.

| chain           | <i>A. baumannii</i><br>residue<br>number | <i>E. coli</i><br>residue<br>number | rRNA<br>helix | details        | scale of<br>difference | quality of density                   |
|-----------------|------------------------------------------|-------------------------------------|---------------|----------------|------------------------|--------------------------------------|
| <b>rRNAs</b>    |                                          |                                     |               |                |                        |                                      |
| 23S             | 60-64                                    | 60-64                               | H6            | different fold | minor                  | good                                 |
|                 | 99-105                                   | 99-105                              | H7            | different fold | major                  | good                                 |
|                 | 135-147                                  | 135-147                             | H9            | different fold | minor                  | fair                                 |
|                 | 263-284                                  | 263-289                             | H18           | deletion       | major                  | fair                                 |
|                 | 349-365                                  | 354-373                             | H18           | deletion       | major                  | good                                 |
|                 | 634-639                                  | 643-648                             | H31           | different fold | minor                  | good                                 |
|                 | 921-925                                  | 930-935                             | H38           | deletion       | minor                  | good                                 |
|                 | 1130-1134                                | 1140-1143                           | H41-42        | insertion      | minor                  | good                                 |
|                 | 1490-1503                                | 1502-1514                           | H58           | insertion      | minor                  | fair                                 |
|                 | 1701-1738                                | 1710-1749                           | H63           | deletion       | major                  | positions 1713-<br>1725 not resolved |
| 16S             | 70-98                                    | 68-102                              | h6            | deletion       | major                  | positions 78-89 not<br>resolved      |
|                 | 153-165                                  | 157-169                             | h8            | different fold | minor                  | fair                                 |
|                 | 175-189                                  | 179-193                             | h9            | different fold | major                  | good                                 |
|                 | 447-479                                  | 451-482                             | h17           | insertion      | minor                  | fair                                 |
|                 | 1065-1081                                | 1068-1084                           | h35-36        | different fold | minor                  | good                                 |
|                 | 1252-1256                                | 1255-1259                           | h41           | different fold | minor                  | good                                 |
|                 | 1436-1440                                | 1439-1443                           | h44           | different fold | minor                  | fair                                 |
| 5S              | 5'- and 3'-ends                          | 5'- and 3'-ends                     |               | shorter        | minor                  | fair                                 |
|                 | 82-91                                    | 83-93                               | helix IV      | deletion       | major                  | good                                 |
| <b>proteins</b> |                                          |                                     |               |                |                        |                                      |
| uL3             | 85-96                                    | 84-93                               |               | insertion      | major                  | good                                 |
|                 | 104-109                                  | 101-106                             |               | different fold | major                  | good                                 |
| uL6             | 15-23                                    | 15-23                               |               | different fold | minor                  | fair                                 |
|                 | 54-60                                    | 54-60                               |               | different fold | major                  | fair                                 |
| uL14            | 88-92                                    | 88-93                               |               | deletion       | minor                  | good                                 |
| uL16            | 20-24                                    | 20-23                               |               | insertion      | minor                  | good                                 |
| uL18            | 54-64                                    | 53-65                               |               | deletion       | major                  | fair                                 |
| bL19            | N-terminus                               | N-terminus                          |               | extension      | major                  | good                                 |
| uL22            | C-terminus                               | C-terminus                          |               | deletion       | minor                  | good                                 |
| uL23            | N-terminus                               | N-terminus                          |               | deletion       | minor                  | fair                                 |
|                 | 65-74                                    | 66-75                               |               | different fold | minor                  | good                                 |
| uL24            | N-terminus                               | N-terminus                          |               | deletion       | minor                  | good                                 |
|                 | 27-31                                    | 28-33                               |               | deletion       | minor                  | good                                 |
|                 | C-terminus                               | C-terminus                          |               | extension      | minor                  | fair                                 |
| bL25            | 11-16                                    | 9-12                                |               | insertion      | minor                  | good                                 |
|                 | 83-90                                    | 79-86                               |               | different fold | minor                  | good                                 |
| bL32            | 23-33                                    | 23-34                               |               | deletion       | major                  | good                                 |
|                 | 51-55                                    | 52-56                               |               | different fold | minor                  | good                                 |
| bL33            | N-terminus                               | N-terminus                          |               | deletion       | major                  | good                                 |
| bL34            | C-terminus                               | C-terminus                          |               | deletion       | major                  | good                                 |
| bL35            | 17-21                                    | 17-22                               |               | deletion       | minor                  | good                                 |
| uS3             | 59-65                                    | 59-65                               |               | different fold | minor                  | good                                 |
| uS4             | 31-37                                    | 31-36                               |               | insertion      | major                  | fair                                 |
|                 | 82-88                                    | 80-86                               |               | different fold | minor                  | good                                 |

|      |            |            |  |                |       |      |
|------|------------|------------|--|----------------|-------|------|
| uS8  | 53-57      | 53-56      |  | insertion      | minor | good |
| uS15 | N-terminus | N-terminus |  | different fold | minor | good |
| bS16 | 44-50      | 44-50      |  | different fold | minor | good |
| uS17 | N-terminus | N-terminus |  | different fold | minor | good |

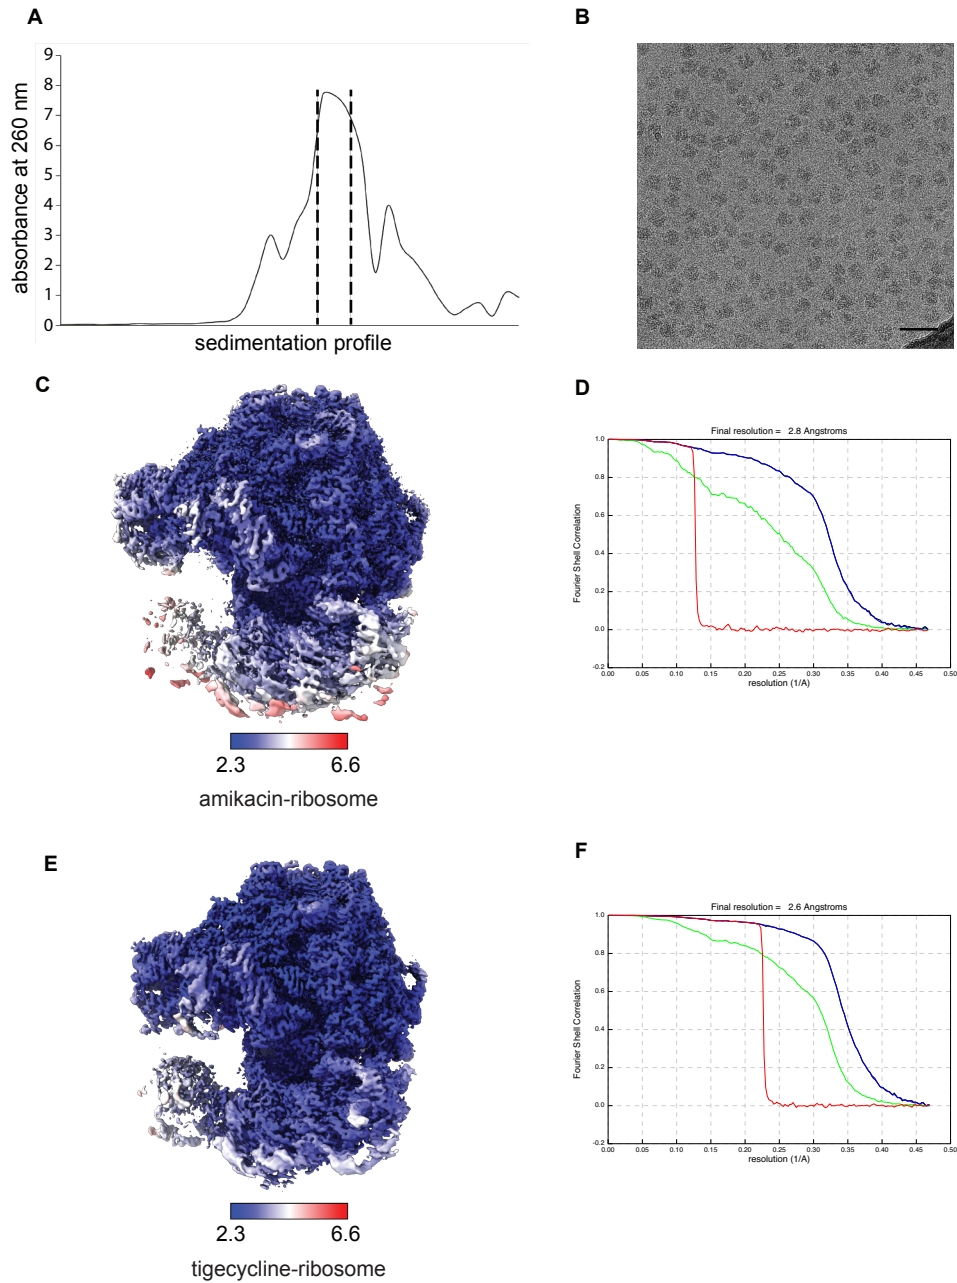

Figure S1. **Sample characterisation and cryoEM image processing, related to Figures 1-5.** A) Sucrose gradient  $A_{260}$  sedimentation profile, showing the peak where fractions were collected. B) Representative cryoEM micrograph of the *A. baumannii* ribosome-amikacin sample, scale bar 50 nm. C) CryoEM reconstruction of the amikacin-ribosome structure, filtered by local resolution. D) FSC curves as a function of resolution for the amikacin-ribosome structure. The resolution that corresponds to an FSC coefficient of 0.143 is 2.8 Å. E) CryoEM reconstruction of the *A. baumannii* ribosome-tigecycline structure, filtered by local resolution. F) FSC curves as a function of resolution for the tigecycline-ribosome structure. The resolution that corresponds to an FSC coefficient of 0.143 is 2.6 Å. Maps coloured by local resolution, from 2.3 Å (blue) to 6.6 Å (red). FSC curves are shown for phase-randomised maps (red), unmasked maps (green), masked maps (blue), and masked maps after correction for mask convolution effects (black).

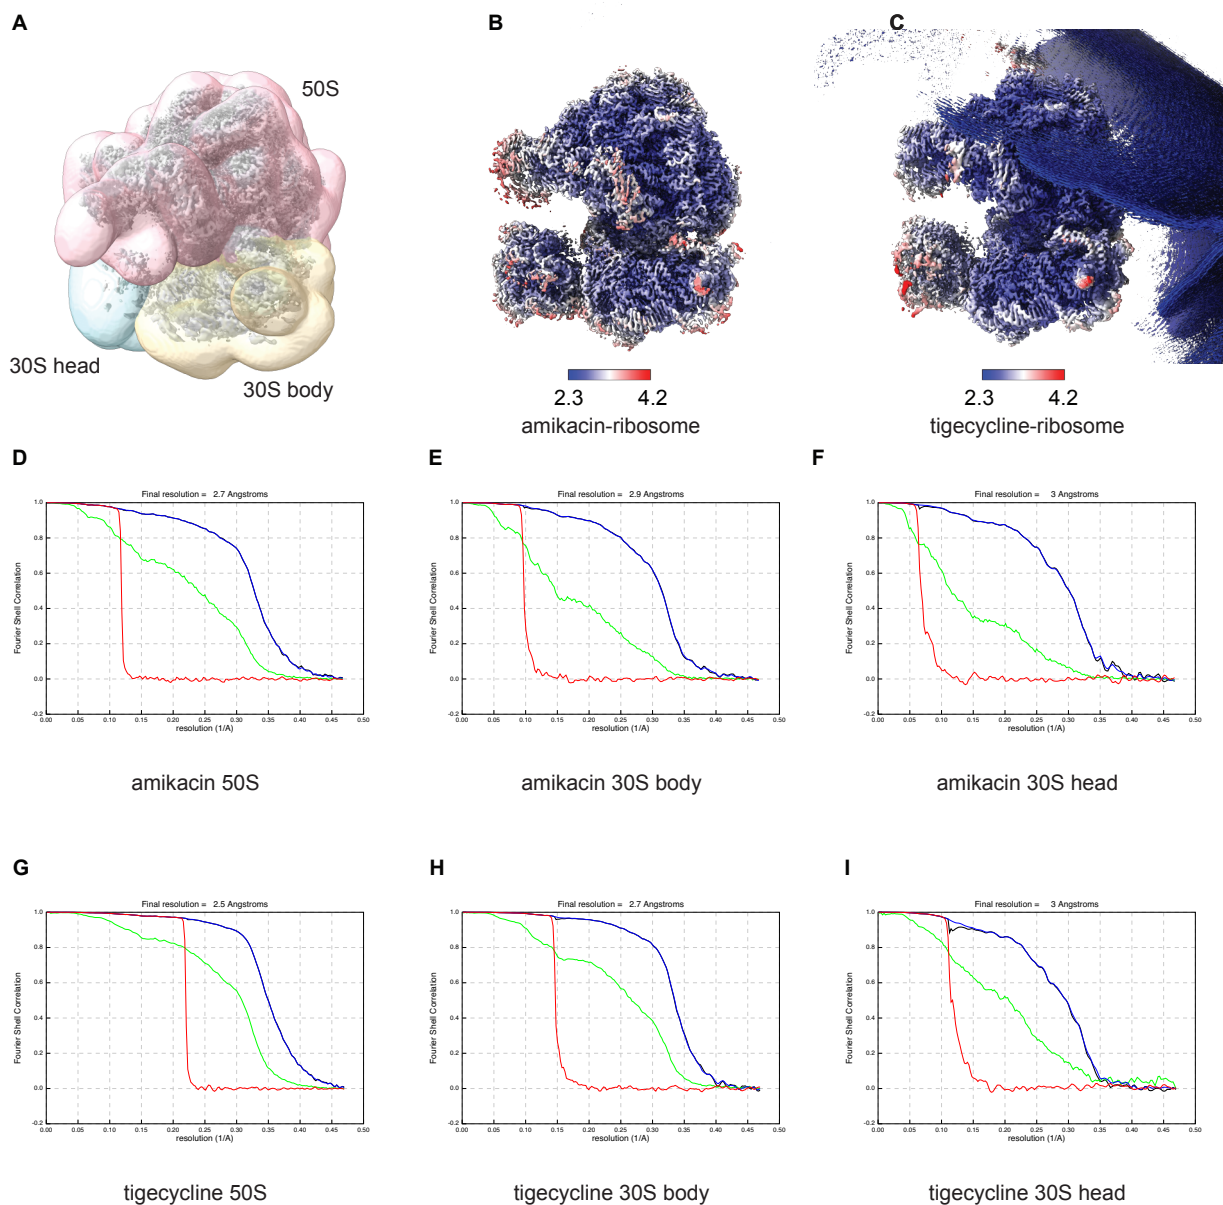

**Figure S2. CryoEM multibody refinement, related to Figure 1-5.** A) Masks used to specify the 50S (pink), 30S body (brown) and 30S head (blue) rigid bodies, shown around the pre-multibody consensus reconstruction of the *A. baumannii* ribosome-amikacin complex (grey). B) CryoEM reconstructions of the three bodies comprising the amikacin-ri-bosome structure after multibody refinement, filtered by local resolution. C) CryoEM reconstructions of the three bodies comprising the tigecycline-ribosome structure after multibody refinement, filtered by local resolution. Maps coloured by local resolution, from 2.3 Å (blue) to 4.2 Å (red). Note that padding in Fourier space was not performed in order to save memory, resulting in artefacts around the edge of the box. This noise was masked out before undertaking model building and refinement. D-F) FSC curves as a function of resolution for the amika-cin-ribosome multibody structures. G-I) FSC curves as a function of resolution for the tigecycline-ribosome multi-body structures. FSC curves are shown for phase-randomised maps (red), unmasked maps (green), masked maps (blue), and masked maps after correction for mask convolution effects (black).

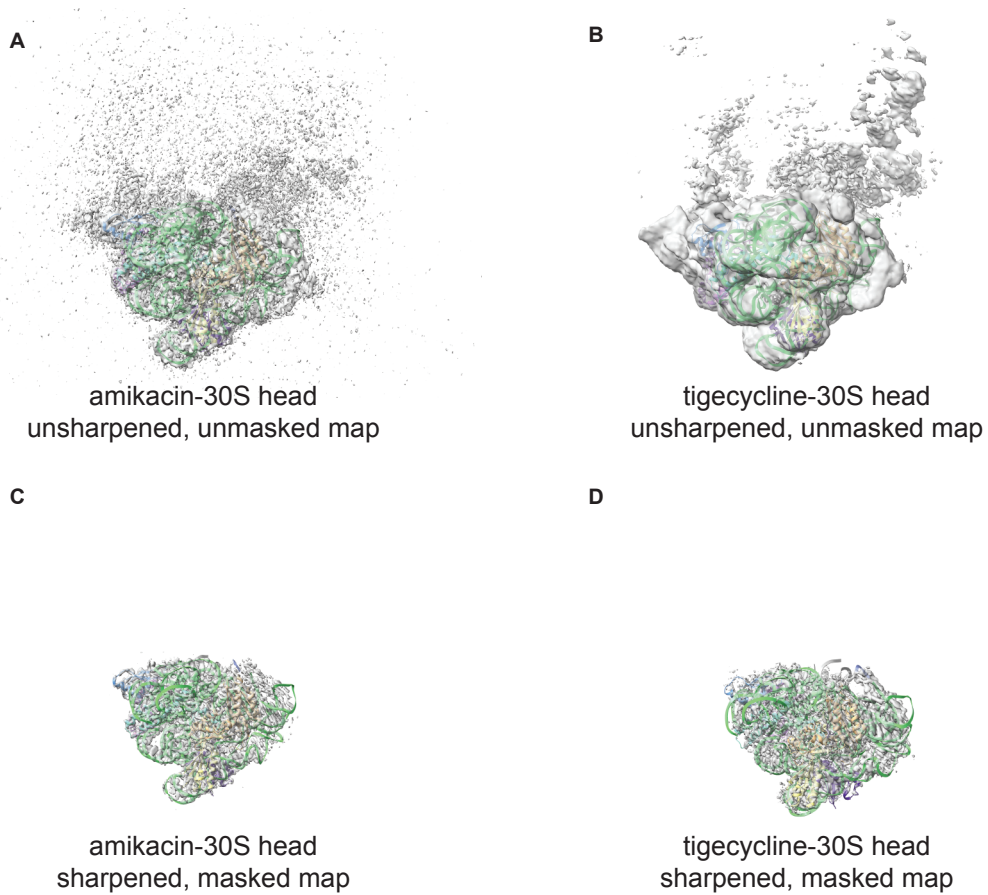

Figure S3. **Comparison of the 30S head EM density of the *A. baumannii* ribosome-amikacin and *A. baumannii* ribosome-tigecycline structures, related to Figure 1-5.** A) Atomic model and EM density of the 30S head of the amikacin-ribosome complex. B) Atomic model and EM density of the 30S head of the tigecycline-ribosome complex. Semi-transparent grey densities correspond to the unsharpened and unmasked outputs of multibody refinement. C) Atomic model and EM of the 30S head of the amikacin-ribosome complex. D) Atomic model and EM density of the 30S head of the tigecycline-ribosome complex. Semi-transparent grey densities correspond to the sharp-ened and masked maps after post-processing of the multibody refinement outputs.



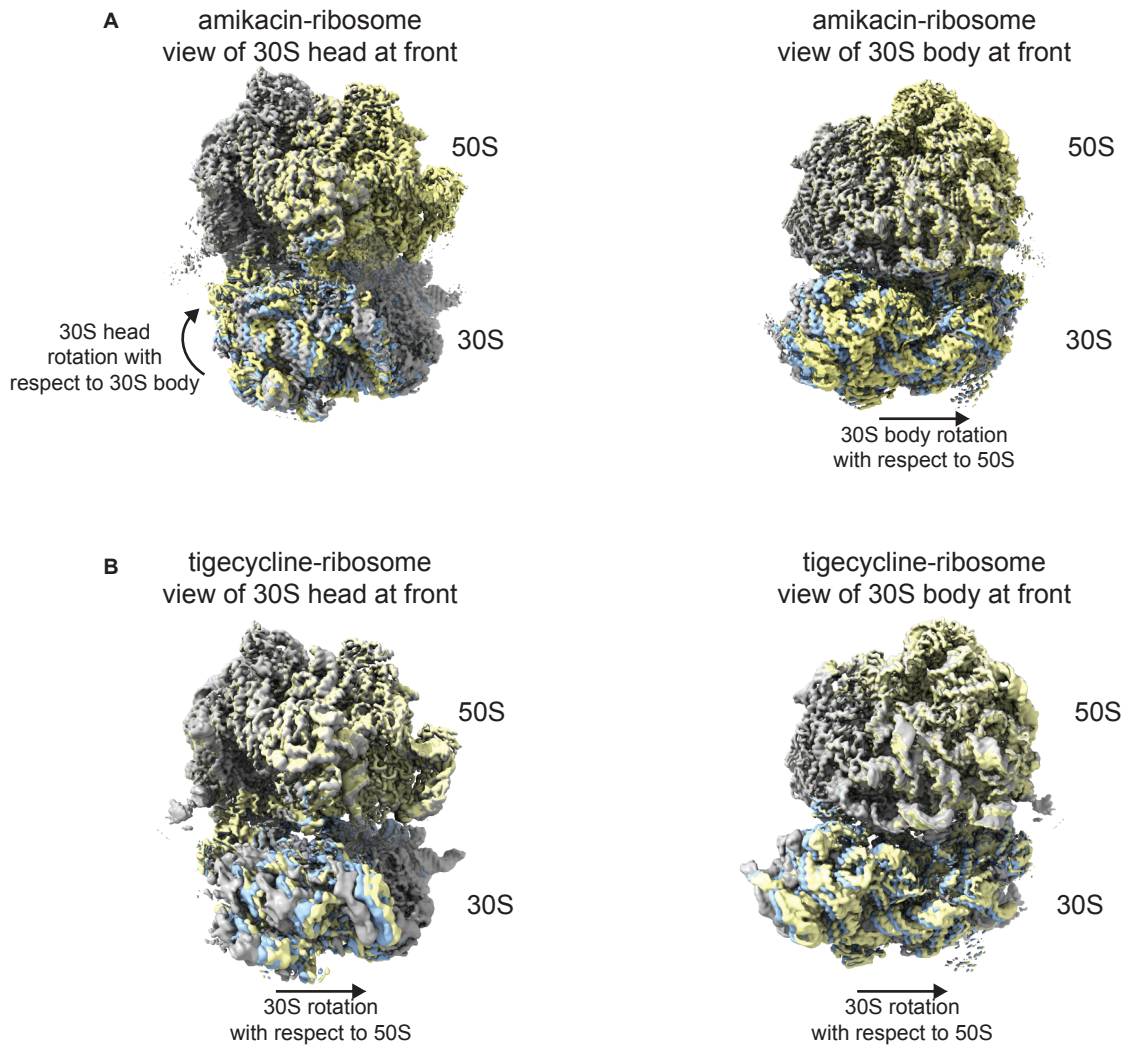

Figure S4. **Comparison of the components contributing the largest variations to the data for the *A. baumannii* ribosome-amikacin and ribosome-tigecycline complexes, related to Figure 1-5.** A) The principle component describing 27% of the variation in the data for the amikacin-ribosome complex. Movement is described along a trajectory from grey to blue to yellow EM density. This component describes a rotation of the 30S head as well as inter-subunit rotation between the 50S and 30S body. B) The principle component describing 28% of the variation in the data for the tigecycline-ribosome complex. Movement is described along a trajectory from grey to blue to yellow EM density. This component describes predominantly inter-subunit rotation between the 50S and 30S.

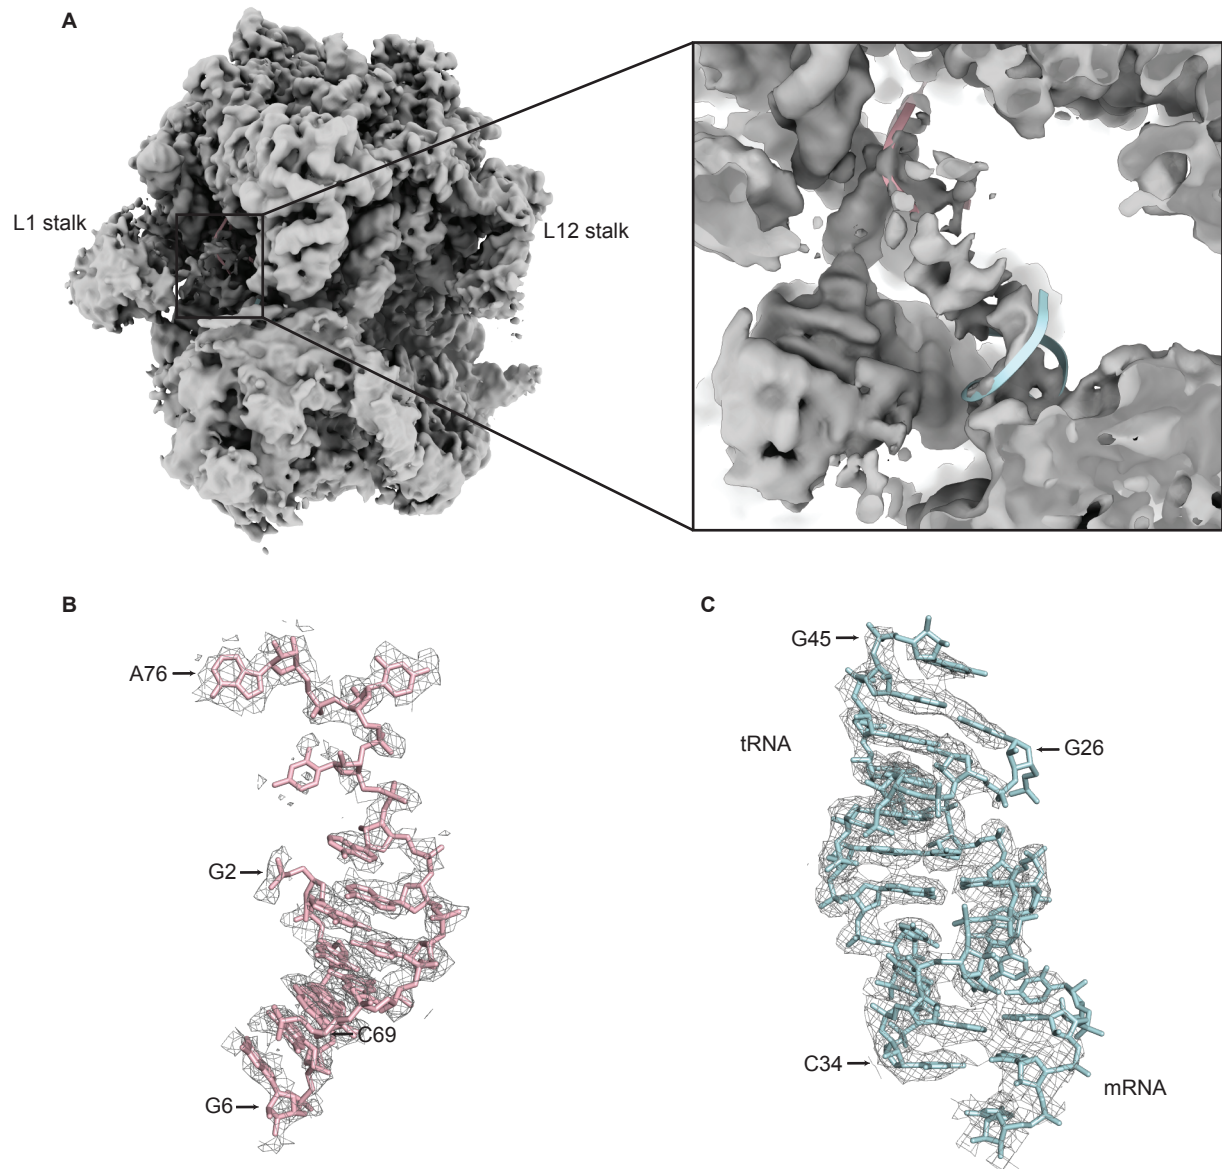

Figure S5. **CryoEM density and atomic model of E-site tRNA and mRNA, related to Figures 1-3.** A) Unsharpened consensus reconstruction of the amikacin-ribosome complex lowpass filtered to 5 Å. Weak cryoEM density is seen in the E-site of the ribosome that can fit tRNA and mRNA (ribbon). B) Atomic model of the 5' and 3' ends of E-site tRNA (light pink), derived from an *E. coli* fMet-tRNA starting model and fitted and refined into the sharpened and masked 50S multibody reconstruction (grey mesh). C) Atomic model of the anticodon stem-loop of the E-site tRNA, derived from an *E. coli* fMet-tRNA starting model, and a short polyuridine mRNA (light blue), fitted and refined into the sharpened and masked 30S head multibody reconstruction (grey mesh).

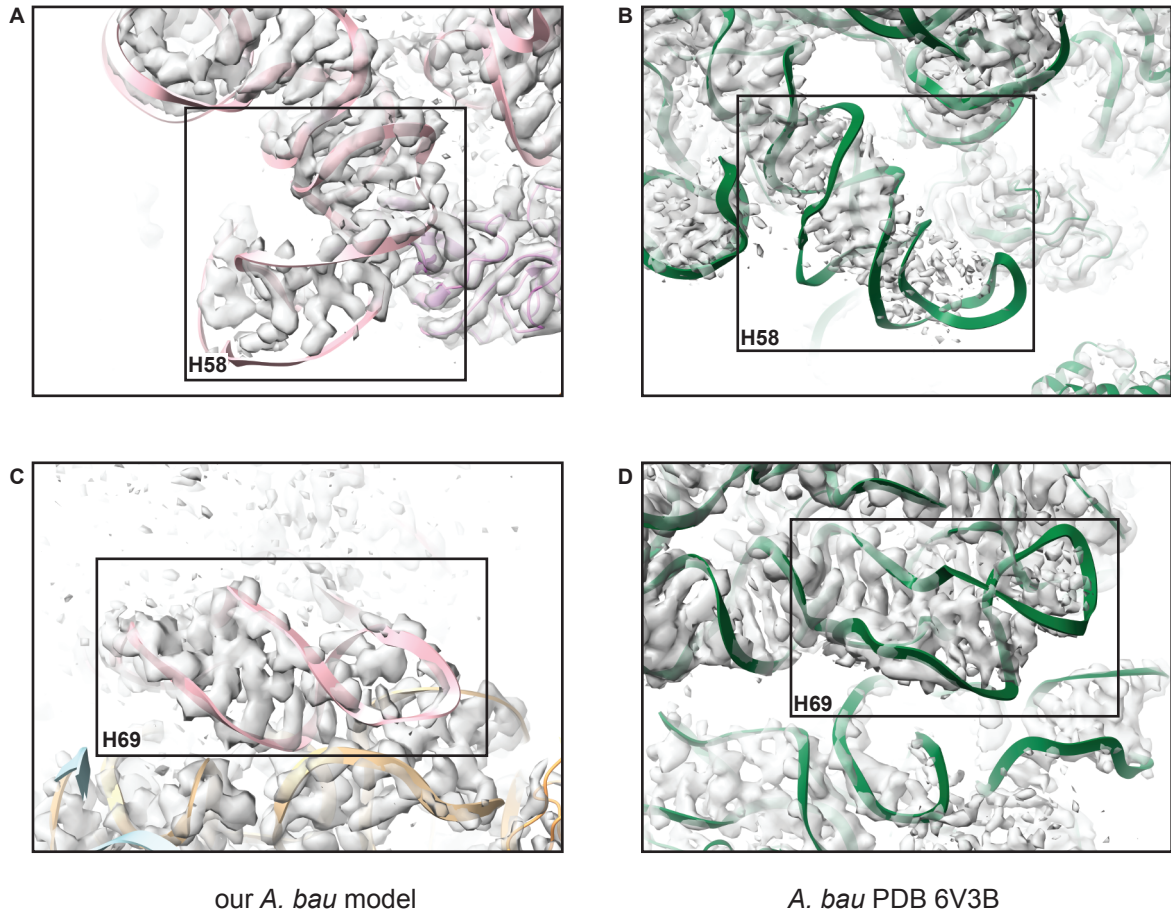

Figure S6. EM density of 23S rRNA H58 and H69 of the *A. baumannii* ATCC 19606 and *A. baumannii* AB0057 ribosomes. Related to Figure 4. A) H58 of the *A. baumannii* amikacin-ribosome model presented in this paper (pink, strain ATCC 19606), shown in the consensus EM map filtered by local resolution (grey). B) H58 of the alternative *A. baumannii* ribosome model of the alternative *A. baumannii* ribosome model (green, strain AB0057, PDB 6V3B) shown in the corresponding EM map (grey, EMD-21032). C) H69 of the *A. baumannii* amikacin-ribosome model presented in this paper (pink, strain ATCC 19606), shown in the consensus EM map filtered by local resolution (grey). D) H69 of the alternative *A. baumannii* ribosome model (green, strain AB0057, PDB 6V3B) shown in the corresponding EM map (grey, EMD-21032). In all cases, the EM density shows that the different helix conformations shown in Figure 4 correspond to the data and are not modelling errors.

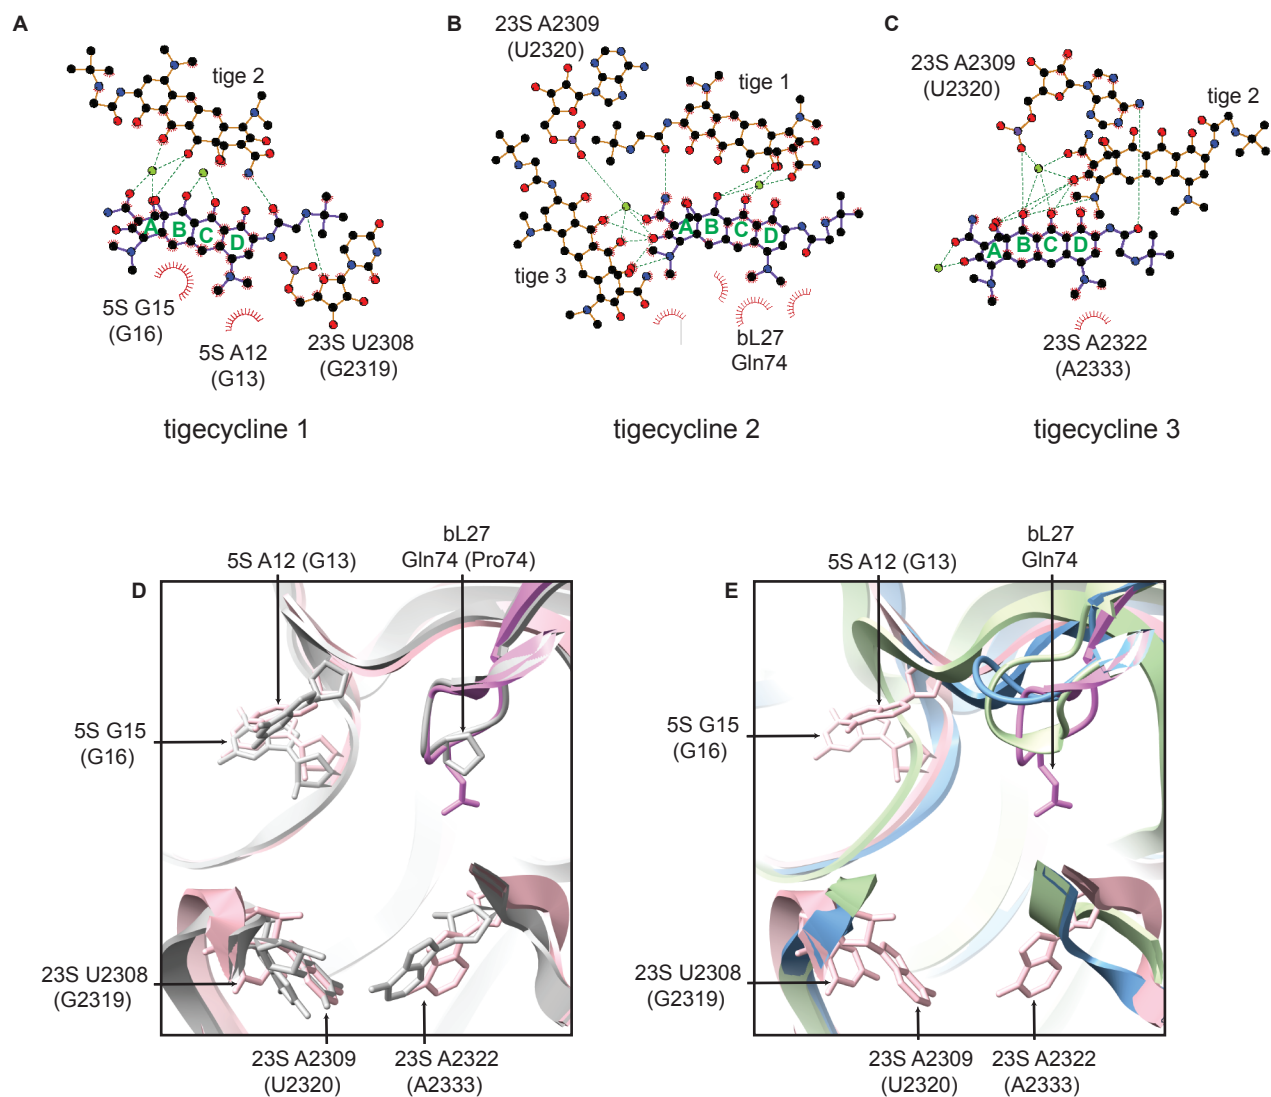

**Figure S7. The secondary tigecycline binding site. Related to Figure 7.** A-C) 2D diagrams representing the interactions that the 3 tigecycline molecules make with the surrounding ribosome. Red spikes represent hydrophobic interactions and green dashes represent polar or ionic interactions. LigPlot+ (Laskowski and Swindells, 2011) was used to generate the diagrams, which were then adapted to highlight the major interactions calculated by Arpeggio (Jubb et al., 2017). D) Atomic model of the *A. baumannii* ribosome-amikacin complex showing the secondary tigecycline binding site (with no drug bound), with residues that interact with tigecycline highlighted (pink), and atomic model of the *E. coli* ribosome with the equivalent *E. coli* residues highlighted (grey, PDB 5MDZ). Many of the residues proposed to be involved in tigecycline binding take similar conformations in the two structures. E) Atomic models of the secondary tigecycline binding site in the *A. baumannii* ribosome-amikacin complex (pink), *S. aureus* ribosome (blue, PDB 5LI0) and *T. thermophilus* ribosome (green, PDB 5E81). The rRNA surrounding the binding site and the loop in bL27, proposed to be involved in tigecycline binding, take up quite different folds in these structures. *E. coli* numbering is shown in parentheses.
